**Table 1. Diagnostic Signs for Correct Position *versus* Malposition with Airway Obstruction of the Laryngeal Mask Airway ProSeal™**

|                                    | Correct   | Distal Cuff in Glottic Inlet | Severe Epiglottic Downfolding | Glottic Compression  |
|------------------------------------|-----------|------------------------------|-------------------------------|----------------------|
| Resistance at insertion            | Nil       | In pharynx                   | In pharynx or nil             | Nil                  |
| Location of bite block to incisors | Between   | Proximal                     | Between                       | Between              |
| Popping out of the mouth           | No        | Yes                          | No                            | No                   |
| Airway obstruction                 | No        | Yes                          | Yes                           | Yes                  |
| Seal                               | Good      | Poor                         | Good                          | Good                 |
| Drain tube leak                    | No        | Yes                          | No                            | No                   |
| Drain tube patency                 | Yes       | Yes                          | Yes                           | Yes                  |
| Esophageal leak                    | No        | Possible                     | No                            | No                   |
| LMA-PTM pushed in further          | No effect | Deterioration                | No effect                     | Deterioration        |
| Sniffing position/jaw thrust       | No effect | No effect                    | Obstruction improved          | Obstruction improved |
| Decreasing cuff volume             | No change | No change                    | Obstruction unaffected        | Obstruction improved |

From Brimacombe JR<sup>7</sup>; used with permission.

5–15%. Three percent of LMA-PTM malpositions occur with the distal cuff of the device in the glottic inlet, severe epiglottic downfolding occurs in < 0.5%, and glottic compression occurs in 0.3%. These types of LMA-PTM malposition are associated with airway obstruction as diagnosed in table 1.<sup>6</sup>

The esophageal drain tube is designed to aid the clinician in detecting malposition.<sup>7</sup> Free passage of a gastric tube *via* the drain tube provides information about the position and patency of the drain tube of the LMA-PTM or LMA-STM. The “bubble test” described by O'Connor and Stix<sup>8</sup> detects misalignment of the distal tip of the LMA-PTM or LMA-STM with the glottic inlet. Reseating the LMA-PTM/LMA-STM with a jaw thrust maneuver may be helpful.<sup>6</sup>

The challenge of attaining expertise and facility with any new airway device remains the clinical problem to solve. This depends, in part, on review of the existing scientific literature as well as ongoing clinical experience. Kleine-Brucegeny *et al.* should be commended for initiating a clinical dialogue about the LMA-STM, a new but potentially useful advancement in airway management.

**Irene P. Osborn, M.D.,\* Elizabeth C. Behringer, M.D., Richard M. Cooper, B.Sc., M.Sc., M.D., F.R.C.P.C., Chandy Verghese, M.B.B.S., F.R.C.A.** \*Mount Sinai School of Medicine, New York, New York. irene.osborn@mssm.edu

## References

1. Kleine-Brucegeny M, Theiler LG, Luyet C, Greif R: Acute airway obstruction caused by the new single use Laryngeal Mask Airway Supreme. *ANESTHESIOLOGY* 2009; 110:189–90
2. Eschertzhuber S, Brimacombe J, Hohlrieder M, Keller C: The laryngeal mask airway Supreme—a single use laryngeal mask airway with an oesophageal vent. A randomised, cross-over study with the laryngeal mask airway ProSeal in paralysed, anaesthetised patients. *Anaesthesia* 2009; 64:79–83
3. Verghese C, Ramaswamy B: LMA-Supreme—a new single-use LMA with gastric access: A report on its clinical efficacy. *Br J Anaesth* 2008; 101:405–10
4. Xue FS, Mao P, Liu HP, Yang QY, Li CW, He N, Xu YC, Liao X: The effects of head flexion on airway seal, quality of ventilation and orogastric tube placement using the ProSeal laryngeal mask airway. *Anaesthesia* 2008; 63: 979–85
5. Stix MS, O'Connor CJ Jr: Depth of insertion of the ProSeal laryngeal mask airway. *Br J Anaesth* 2003; 90:235–7
6. ProSeal LMA for ventilation and airway protection: in *Laryngeal Mask Anesthesia: Principles and Practice*. 2nd edition. Brimacombe JR (ed), Chapter 19. Saunders, Philadelphia 2005
7. Cook TM, Lee G, Nolan JP: The ProSeal laryngeal mask airway: A review of the literature. *Can J Anaesth* 2005; 52:739–60
8. O'Connor CJ Jr, Stix MS: Bubble solution diagnoses ProSeal insertion into the glottis. *Anesth Analg* 2002; 94:1671–2

(Accepted for publication April 23, 2009.)

Anesthesiology 2009; 111:452–3

Copyright © 2009, the American Society of Anesthesiologists, Inc. Lippincott Williams & Wilkins, Inc.

*In Reply:*—We thank Osborn *et al.* for starting an interesting debate about the use of new supraglottic devices in clinical practice without solid evidence on their performance.

As described earlier for the *Laryngeal Mask Airway ProSeal™* (LMA-PTM),<sup>1</sup> we reported an unexpected acute airway obstruction caused by the *Laryngeal Mask Airway Supreme™* (LMA-STM), which ultimately was interpreted as a medial displacement of the laryngeal inlet by the mask itself, leading to airway obstruction, stridor, and ventilation difficulty.<sup>2</sup>

The patient's head was in the neutral position without head flexion and slightly elevated, as recommended. His height was 1.78 m, he weighed 95.6 kg (body mass index 30.2 kg/m<sup>2</sup>). Based on the patient's characteristics and the recommendation in the LMA-STM instruction manual, the LMA-STM size 5 was the correct one. We acknowledge other suggestions regarding how to choose the right size of an LMA-STM.

In 2003, Stix *et al.* described malposition of the LMA-PTM indicated by the depth of the bite block.<sup>3</sup> Whether this applies to the LMA-STM with its different construction as well is speculative, and we cannot comment on that. In our case, the bite block did not remain outside of the mouth.

We also cannot judge whether an LMA-STM size 4 would have changed the airway problem. Our report was not intended to show all possibilities how to resolve airway obstructions with the use of an LMA™, but rather to point out that such obstruction may happen.

Osborn *et al.* mention that the cuff volume of the size 5 LMA-STM should not exceed 45 ml. We completely agree that overinflation needs to be avoided carefully in any cuffed supraglottic airway device. Besides airway obstruction, it might also cause nerve damage.<sup>4</sup> Clinical observation in the operating room showed us that even 45 ml often results in high cuff pressures. The cuff volume in the patient presented was well below 45 ml, leading to a cuff pressure of 60 cm H<sub>2</sub>O.

Our clinical practice with the LMA-PTM includes the described methods to detect malposition. Whether these also apply to the LMA-STM needs to be proven. In the case described, we had the luxury of having a fiberoptic bronchoscope immediately available to directly visualize the reason for the airway obstruction.

We disagree that previously published findings regarding the performance of the LMA-PTM should automatically apply to the LMA-STM, as

Osborn *et al.* imply. The *LMA-S*<sup>TM</sup> should not be confused with the *LMA-P*<sup>TM</sup>. It is not a single-use *LMA-P*<sup>TM</sup> because substantial details are designed and constructed in a different way to overcome weaknesses of other *LMAs*<sup>TM</sup>, as the producers of the *LMA-S*<sup>TM</sup> promote their device. The *LMA-S*<sup>TM</sup>'s clinical performance can only be evaluated in clinical trials. First published comparisons with a reasonable sample size between the *LMA-P*<sup>TM</sup> and *LMA-S*<sup>TM</sup><sup>5</sup> showed clinically important differences in the seal pressure between both devices.

We affirm our statement that acute airway obstruction of *LMAs*<sup>TM</sup> can occur at any time, and backup strategies for the failure of the backup device *LMA*<sup>TM</sup> have to be considered.

**Lorenz G. Theiler, M.D.,\* Maren Kleine-Brueggemann, M.D., Robert Greif, M.D., M.M.E.** \*University Hospital Bern, Bern, Switzerland. lorenz.theiler@insel.ch

## References

1. Stix MS, O'Connor CJ Jr, Valade DR: The ProSeal LMA does not cause laryngeal edema. *Can J Anaesth* 2006; 53:961-3
2. Kleine-Brueggemann M, Theiler LG, Luyet C, Greif R: Acute airway obstruction caused by the new single use Laryngeal Mask Airway Supreme. *ANESTHESIOLOGY* 2009; 110:189-90
3. Stix MS, O'Connor CJ Jr: Depth of insertion of the ProSeal laryngeal mask airway. *Br J Anaesth* 2003; 90:235-7.
4. Brimacombe J, Clarke G, Keller C: Lingual nerve injury associated with the ProSeal laryngeal mask airway: A case report and review of the literature. *Br J Anaesth* 2005; 95:420-3
5. Eschertzhuber S, Brimacombe J, Hohlrieder M, Keller C: The laryngeal mask airway Supreme - a single use laryngeal mask airway with an oesophageal vent. A randomised, cross-over study with the laryngeal mask airway ProSeal in paralysed, anaesthetised patients. *Anaesthesia* 2009; 64:79-83

(Accepted for publication April 23, 2009.)

Anesthesiology 2009; 111:453

Copyright © 2009, the American Society of Anesthesiologists, Inc. Lippincott Williams & Wilkins, Inc.

## Hypothermia Should Also Have Been Considered to Be a Predictor of Adverse Perioperative Cardiac Events

*To the Editor:*—I read with interest the article by Kheterpal *et al.*<sup>1</sup> However, I am concerned that they did not control for hypothermia in their analysis. Hypothermia is considered to be a risk factor for morbid cardiac events.<sup>2,3</sup> Without controlling for this variable, the risk assigned to their nine variables may be different than what was reported. For example, suppose the elderly patients became hypothermic more readily than the nonelderly patients. If this was the case, then the risk factor of being elderly may be overestimated, as it could have been the hypothermia and not the age that caused the problem in the elderly patient. I suspect that accurate core temperatures were not measured in most, if not all, patients who did not receive general anesthesia. However, the study population seems large enough to allow for a separate analysis of patients who did have their core temperature recorded. Do the authors have any temperature analysis that was not reported in the article?

**Jonathan V. Roth, M.D.,** Albert Einstein Medical Center, Philadelphia, Pennsylvania. rothj@einstein.edu

## References

1. Kheterpal S, O'Reilly M, Englesbe MJ, Rosenberg AL, Shanks AM, Zhang L, Rothman ED, Campbell DA, Tremper KK: Preoperative and intraoperative predictors of cardiac adverse events after general, vascular, and urological surgery. *ANESTHESIOLOGY* 2009; 110:58-66
2. Sessler DI: Temperature monitoring and perioperative thermoregulation. *ANESTHESIOLOGY* 2008; 109:318-38
3. Frank SM, Fleisher LA, Breslow MJ, Higgins MS, Olson KF, Kelly S, Beattie C: Perioperative maintenance of normothermia reduces the incidence of morbid cardiac events: A randomized clinical trial. *JAMA* 1997; 277:1127-34

(Accepted for publication April 27, 2009.)

Anesthesiology 2009; 111:453-4

Copyright © 2009, the American Society of Anesthesiologists, Inc. Lippincott Williams & Wilkins, Inc.

*In Reply:*—We thank Dr. Roth for his interest in our article and insightful commentary. Previous literature has demonstrated an association between intraoperative hypothermia and cardiac adverse events. However, we did not evaluate this clinical element in our analysis for several reasons. First, previous data regarding hypothermia and cardiac adverse events is limited to high-risk patients who had a preexisting diagnosis of coronary artery disease or several known risk factors for coronary artery disease undergoing high-risk thoracic, intraperitoneal, or vascular procedures.<sup>1</sup> Although our dataset included some high-risk patients, only 9.6% had a previous cardiac intervention and only 22% were undergoing high-risk surgery.<sup>2</sup> As a result, the studied population was dissimilar to previous work, and we were skeptical of being able to identify an association between hypothermia and cardiac adverse events in this more representative population. Second, although our studied dataset was large, we were only able to observe 83 events. As a result, we had to limit the number of independent variables evaluated in

the logistic regression full-model fit to reduce the impact of model overfitting.<sup>3</sup> Hypothermia was one of several independent variables that we were unable to assess because of this statistical analysis constraint.

Finally, the absence of a consistent way to separate "hypothermic" versus "normothermic" groups in an observational dataset presented the final challenge. There are several ways to define hypothermia. First, we could evaluate median temperatures within 10-min epochs, similar to the presented hypotension analysis. Second, some may advocate that a single temperature measurement below 36°C would qualify as "hypothermic." Third, others may suggest that we employ the absence of active warming to be consistent with prospective, controlled studies.

We agree that intraoperative hypothermia should be evaluated in future studies. We look forward to conducting large, multicenter observational dataset analyses that may offer us the statistical power necessary to do so.

Anesthesiology, V 111, No 2, Aug 2009
